# Supplementary material for: Plasma biomarker profiles in autosomal dominant Alzheimer’s disease
Source: PubMed Central journal article supplement (PMC9976964; doi:10.1093/brain/awac399), 2023-01-11
Supplement: awac399_supplementary_data.pdf [file awac399_supplementary_data.pdf]

# Supplementary Material

Johansson C, Thordardottir S, Laffita J, *et al.* Plasma biomarkers profiles in autosomal dominant Alzheimer Disease

**Corresponding author:** Caroline Graff, Karolinska Institutet, Dept NVS, Division of Neurogeriatrics, Center for Alzheimer Disease Research, Bioclinicum J10:20, Visionsgatan 4, 171 64 Solna, Sweden.

**Tel:** +46 (0) 73 383 93 99, **E-mail:** caroline.graff@ki.se

## Table of content

### Supplementary Tables

**Supplementary Table 1.** MC samples by mutation

**Supplementary Table 2.** Results from the longitudinal analyses of plasma biomarkers in all MC vs NC using mixed effects models

**Supplementary Table 3.** Correlation table, plasma and CSF biomarkers

**Supplementary Table 4.** Sampling occasions included in longitudinal analysis

**Supplementary Table 5.** Exploratory results from the longitudinal analyses of plasma biomarkers in *APP<sup>swe</sup>* MC vs NC using mixed effects models

**Supplementary Table 6.** Exploratory results from the longitudinal analyses of plasma biomarkers in *APP<sup>arc</sup>* MC vs NC using mixed effects models

**Supplementary Table 7.** Exploratory results from the longitudinal analyses of plasma biomarkers in *PSEN1* MC vs NC using mixed effects models

### Supplementary Figures

**Supplementary Fig. 1.** Flow chart of sample cohort

**Supplementary Fig. 2.** Exploratory longitudinal data, individual trajectories.

**Supplementary Fig. 3.** Exploratory cross-sectional data, *APP<sup>swe</sup>*

**Supplementary Fig. 4.** Exploratory cross-sectional data, *APP<sup>arc</sup>*

**Supplementary Fig. 5.** Exploratory cross-sectional data, *PSEN1* p.H163Y

**Supplementary Fig. 6.** Exploratory analysis of longitudinal plasma biomarker levels, by mutation

**Supplementary Table 1. MC samples by mutation**

|                           | PMC     | SMC |
|---------------------------|---------|-----|
|                           | Samples |     |
| <i>APP</i> <sub>arc</sub> | 16      | 19  |
| <i>APP</i> <sub>swe</sub> | 17      | 6   |
| <i>PSEN1</i> p.H163Y      | 26      | 3   |
| Total                     | 59      | 28  |

Samples analyzed in the longitudinal study, family-wise. Non-carriers from the three families were included together as the reference group in all analyses (n=42, 77 samples). In total 75 individuals and 164 samples were included.

**Supplementary Table 2. Results from the longitudinal analyses of plasma biomarkers in all MC vs NC using mixed effects models**

|                 | EYO             | EYO <sup>2</sup> | Mut status          | Mut status*EYO   |
|-----------------|-----------------|------------------|---------------------|------------------|
|                 | Estimate [SE]   | Estimate [SE]    | Estimate [SE]       | Estimate [SE]    |
| Plasma T-tau    | ns              | ns               | ns                  | ns               |
| Plasma P-tau181 | 0.339 [0.112]** | ns               | 13.401 [4.385]**    | 0.727 [0.270]**  |
| Plasma NfL      | 0.201 [0.101]*  | ns               | 5.014 [2.324]*      | 0.328 [0.140]*   |
| Plasma GFAP     | 1.074 [0.490]*  | ns               | 135.104 [32.813]*** | 7.931 [2.072]*** |

164 samples from all families were included, 87 samples from 33 MC and 77 samples from 42 NC. Table shows estimates, the standard error [SE] and statistical significance (\*p<0,05, \*\*p<0,01, \*\*\*p<0,001). All models were corrected for APOE status and sex. All results of a positive mutation status and mutation status\*EYO effect remained significant in a sensitivity model removing EDTA samples (n=16) and outliers (>3\*interquartile range). Mut status= Mutation status, here mutation carriers compared to non-carriers.

**Supplementary Table 3. Correlation table, plasma and cerebrospinal fluid biomarkers**

|                 | CSF Aβ1-38 | CSF Aβ1-40 | CSF Aβ1-42 | CSF Aβ1-42/1-40 | CSF T-tau       | CSF P-tau181   |
|-----------------|------------|------------|------------|-----------------|-----------------|----------------|
|                 | (n=26)     | (n=26)     | (n=26)     | (n=26)          | (n=30)          | (n=29)         |
| Plasma T-tau    | ns         | ns         | ns         | ns              | ns              | ns             |
| Plasma P-tau181 | ns         | ns         | ns         | ns              | <b>0.602***</b> | <b>0.563**</b> |
| Plasma NfL      | ns         | ns         | ns         | ns              | ns              | ns             |
| Plasma GFAP     | ns         | -0.469*    | ns         | ns              | ns              | ns             |

Table of Spearman Rho correlation coefficients and significance levels (\*p<0,05, \*\*p<0,01, \*\*\*p<0,001). Reported significance levels are unadjusted, but P-values were corrected for multiple comparison (n=24) by FDR correction and annotated in bold if still significant. When removing EDTA samples (n=5) and outliers (>3\*IQR) (n=1-3), correlation was unchanged between plasma P-tau181 and CSF biomarkers. ns= non-significant, p>0.05.

**Supplementary Table 4. Sampling occasions included in longitudinal analysis**

|         | Baseline | Sampling 2 | Sampling 3 | Sampling 4 | Sampling 5 | Sampling 6 | Sampling 7 | Sampling 8 | Total |
|---------|----------|------------|------------|------------|------------|------------|------------|------------|-------|
| MC (n)  | 33       | 20         | 12         | 8          | 7          | 4          | 2          | 1          | 87    |
| NC (n)  | 42       | 23         | 8          | 3          | 1          |            |            |            | 77    |
| All (n) | 75       | 43         | 20         | 11         | 8          | 4          | 2          | 1          | 164   |

Table indicating number of individuals contributing samples for the longitudinal biomarker analysis, separated by mutation status.

**Supplementary Table 5. Exploratory results from the longitudinal analyses of plasma biomarkers in APPswe MC vs NC using mixed effects models**

|                 | <b>EYO</b><br>Estimate [SE] | <b>Mut status</b><br>Estimate [SE] | <b>Mut status*EYO</b><br>Estimate [SE] |
|-----------------|-----------------------------|------------------------------------|----------------------------------------|
| Plasma T-tau    | ns                          | ns                                 | ns                                     |
| Plasma P-tau181 | 1.141 [0.268]***            | 13.555 [4.470]**                   | 0.793 [0.289]**                        |
| Plasma NFL      | 0.644 [0.168]***            | 7.571 [2.752]**                    | 0.448 [0.181]*                         |
| Plasma GFAP     | 11.338 [1.702]***           | 253.189 [32.187]***                | 10.550 [1.852]***                      |

Mixed effects models of longitudinal data. 100 samples were included (23 samples from 13 APPswe MC and 77 samples from 42 NC). Table shows estimates, the standard error [SE] and statistical significance (\*p<0,05, \*\*p<0,01, \*\*\*p<0,001). All models were corrected for APOE status and sex. Mut status= Mutation status, here APPswe mutation carriers compared to non-carriers.

**Supplementary Table 6. Exploratory results from the longitudinal analyses of plasma biomarkers in APParc MC vs NC using mixed effects models**

|                 | <b>EYO</b><br>Estimate [SE] | <b>Mut status</b><br>Estimate [SE] | <b>Mut status*EYO</b><br>Estimate [SE] |
|-----------------|-----------------------------|------------------------------------|----------------------------------------|
| Plasma T-tau    | ns                          | ns                                 | ns                                     |
| Plasma P-tau181 | ns                          | 11.101 [5.136]*                    | ns                                     |
| Plasma NFL      | ns                          | 6.077 [2.632]*                     | ns                                     |
| Plasma GFAP     | 6.610 [1.862]***            | 75.381 [16.920]***                 | 5.559 [1.965]**                        |

Mixed effects models of longitudinal data. 112 samples were included (35 samples from 13 APParc MC and 77 samples from 42 NC). Table shows estimates, the standard error [SE] and statistical significance (\*p<0,05, \*\*p<0,01, \*\*\*p<0,001). All models were corrected for APOE status and sex. Mut status= Mutation status, here APParc mutation carriers compared to non-carriers.

**Supplementary Table 7. Exploratory results from the longitudinal analyses of plasma biomarkers in PSEN1 MC vs NC using mixed effects models**

|                 | <b>EYO</b><br>Estimate [SE] | <b>Mut status</b><br>Estimate [SE] | <b>Mut status*EYO</b><br>Estimate [SE] |
|-----------------|-----------------------------|------------------------------------|----------------------------------------|
| Plasma T-tau    | ns                          | ns                                 | ns                                     |
| Plasma P-tau181 | 0.383 [0.116]**             | 17.290 [5.164]**                   | 0.985 [0.307]**                        |
| Plasma NFL      | 0.207 [0.062]**             | ns                                 | ns                                     |
| Plasma GFAP     | 1.037 [0.476]*              | 55.878 [19.570]**                  | 4.493 [1.332]**                        |

Mixed effects models of longitudinal data. 106 samples were included (29 samples from 7 PSEN1 MC and 77 samples from 42 NC). Table shows estimates, the standard error [SE] and statistical significance (\*p<0,05, \*\*p<0,01, \*\*\*p<0,001). All models were corrected for APOE status and sex. Mut status= Mutation status, here PSEN1 mutation carriers compared to non-carriers.

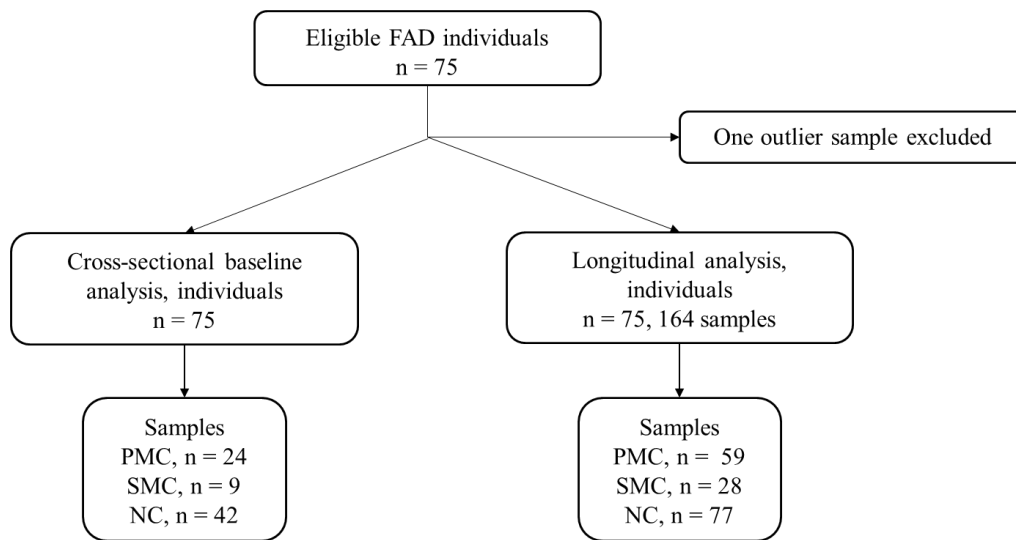

**Supplementary Figure 1. Flow chart of sample cohort.** 75 participants were eligible for inclusion in the plasma biomarker analyses. One NC outlier sample was removed from all analyses due to quality control issues. PMC= Presymptomatic mutation carriers, SMC= Symptomatic mutation carriers, NC= Non-carriers.

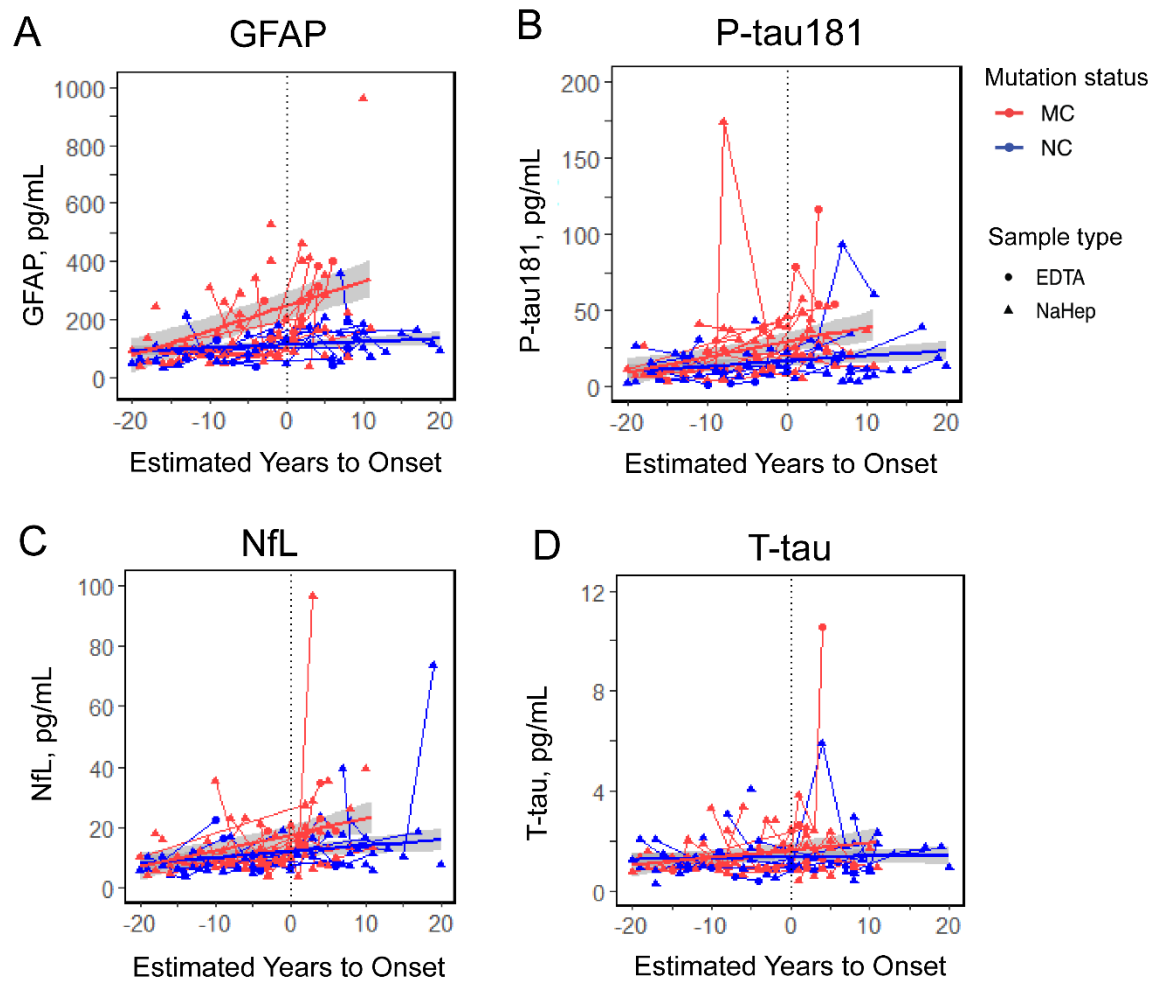

**Supplementary Figure 2. Exploratory longitudinal data, individual trajectories.** Longitudinal plasma concentrations of **(A)** GFAP, **(B)** P-tau181, **(C)** NfL and **(D)** T-tau. Trajectories show repeated measures at the individual level and mixed-effects model fits with 95% confidence bands at the group level in grey, separately for MC (n=33, 87 samples) and NC (n=42, 77 samples). Two presymptomatic MC in the *APP*<sup>swe</sup> family converted (had symptom onset) during follow-up, four in *APP*<sup>arc</sup> and one in the *PSEN1* p.H163Y family. All sampling occasions with positive estimated years to onset ( $\geq 0$ ) were in symptomatic individuals, except for one *PSEN1* MC with reduced penetrance. EDTA samples (n=16) and outliers ( $>3 \times$  interquartile range) were removed as part of a mixed models sensitivity analysis as described in text. NC = non-carriers, MC = mutation carriers. EDTA = ethylenediamine tetraacetic acid anticoagulant, NaHep = sodium heparin anticoagulant.

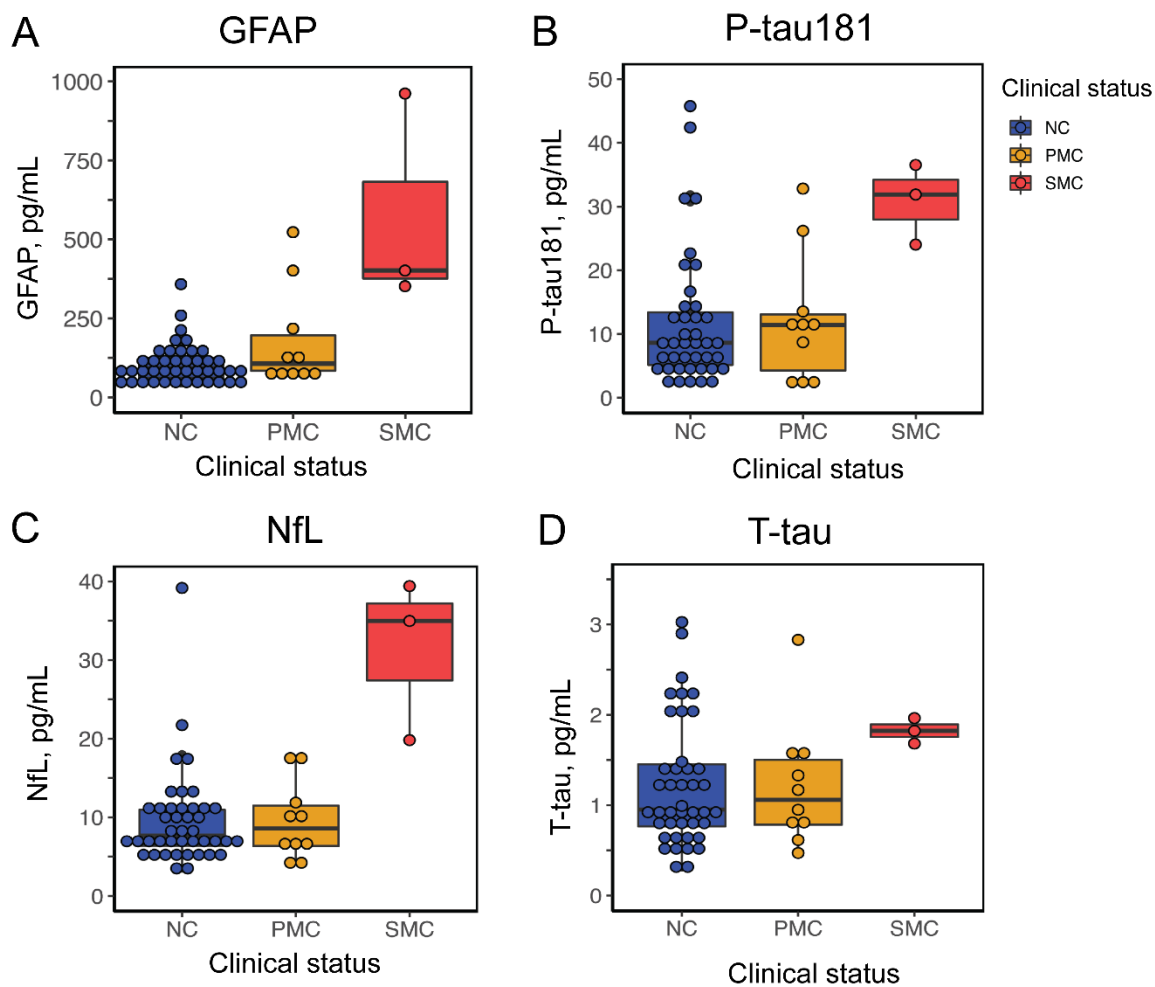

**Supplementary Figure 3. Exploratory cross-sectional data, APPswe.** Baseline data, plasma biomarkers in the APPswe family. NfL was significantly increased in SMC compared to both NC and PMC ( $p < 0.05$ ). GFAP and P-tau181 was increased in SMC compared to NC, but not PMC ( $p < 0.05$ ), as calculated with Kruskal Wallis test.

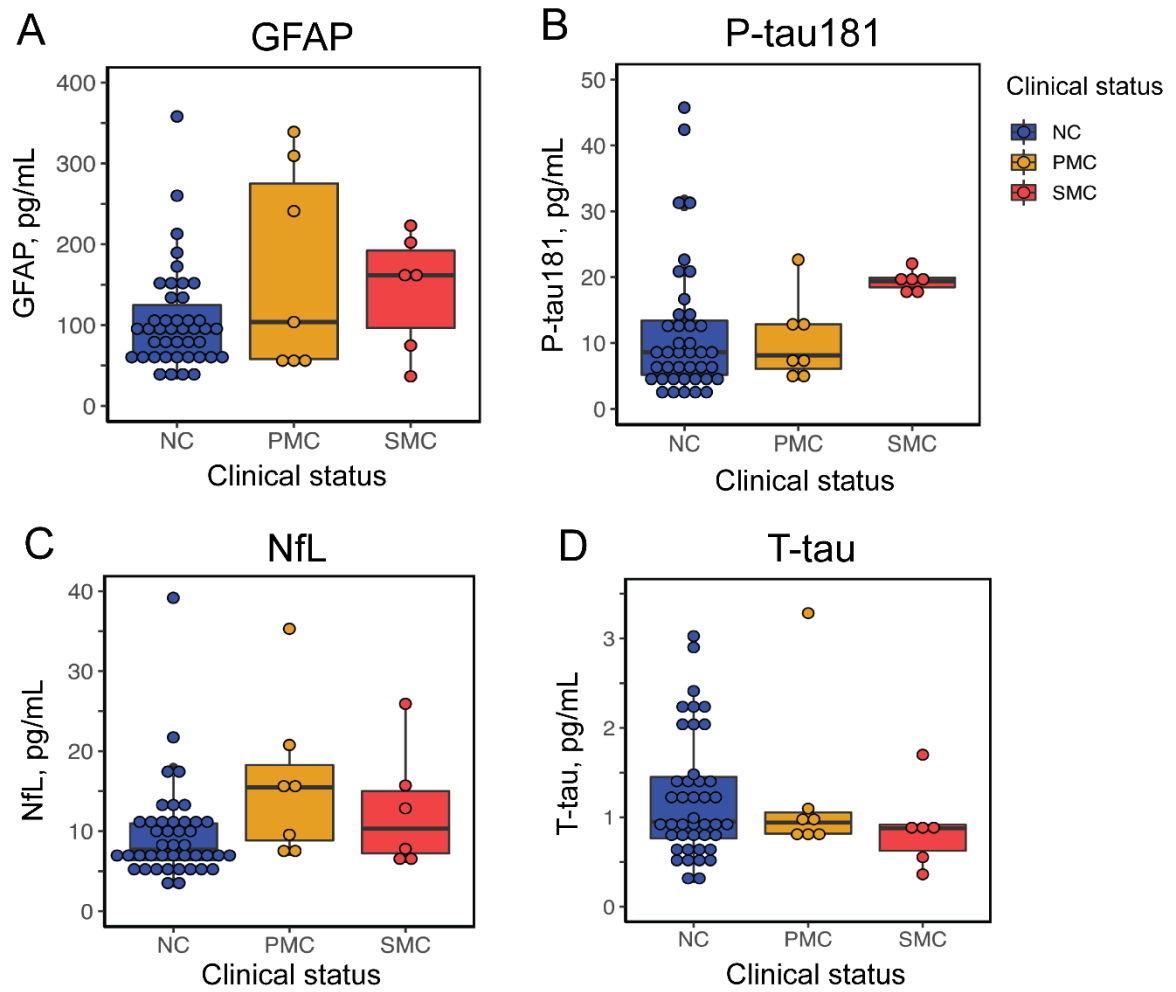

**Supplementary Figure 4. Exploratory cross-sectional data, APParc.** Baseline data, plasma biomarkers in the APParc family. P-tau181 was significantly increased in SMC compared to NC ( $p < 0.05$ ), but not PMC, as calculated with Kruskal Wallis test. No other between-group differences were detected.



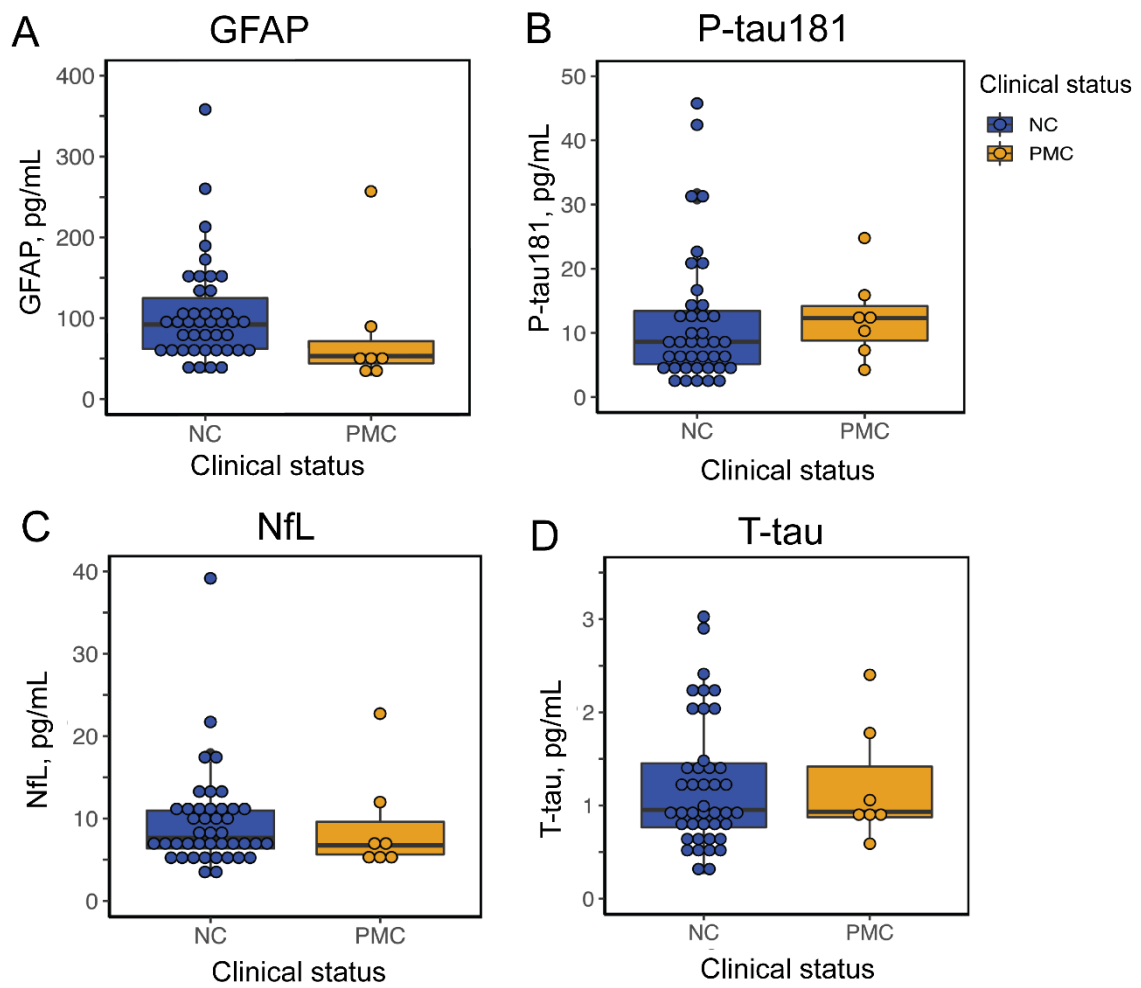

**Supplementary Figure 5. Exploratory cross-sectional data, *PSEN1* p.H163Y.** Baseline data, plasma biomarkers in the *PSEN1* p.H163Y family. GFAP was lower in PMC compared to NC ( $p < 0.05$ ) as calculated with Mann-Whitney U test. No other between-group differences were detected. This finding is likely explained by the younger age of *PSEN1* PMC (median age 31, range 27-44) compared to NC (median age 43, range 20-86).

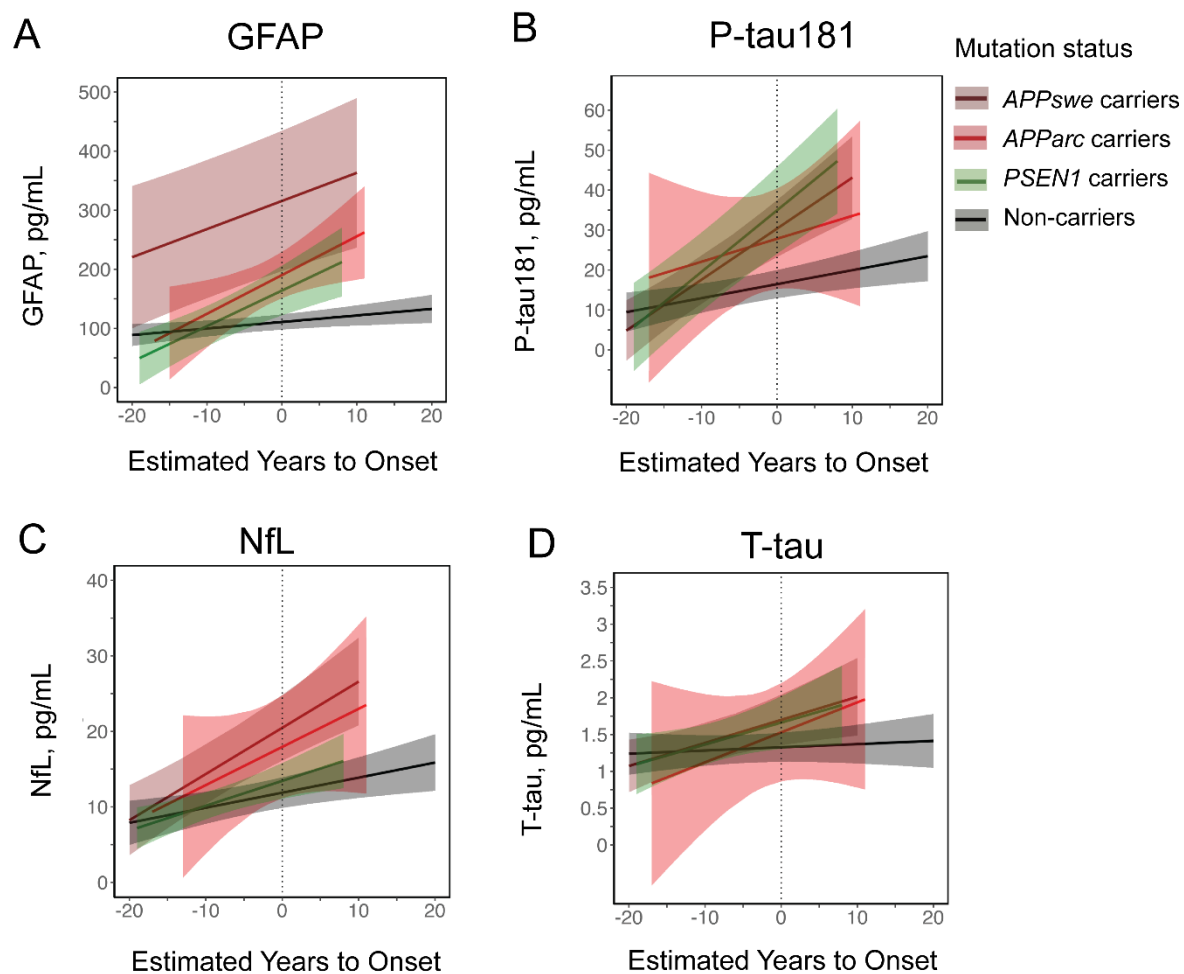

**Supplementary Figure 6. Exploratory analysis of longitudinal plasma biomarker levels, by mutation.** Longitudinal plasma concentrations of **(A)** GFAP, **(B)** P-tau181, **(C)** NfL and **(D)** T-tau. Trajectories show mixed-effects model fits with 95% confidence bands at the group level, separately for APP<sub>swe</sub> MC (n=13, 23 samples), APP<sub>arc</sub> MC (n=13, 35 samples), PSEN1 p.H163Y MC (n=7, 29 samples) and NC (n=42, 77 samples). NC = non-carriers, MC = mutation carriers.
